# Supplementary material
Source: Springer Nature journal article supplement (https://www.springermedizin.de/resource/supplementary/13017_2008_95_MOESM2_ESM.pdf/9635458)

01-033378  
12-04-2001

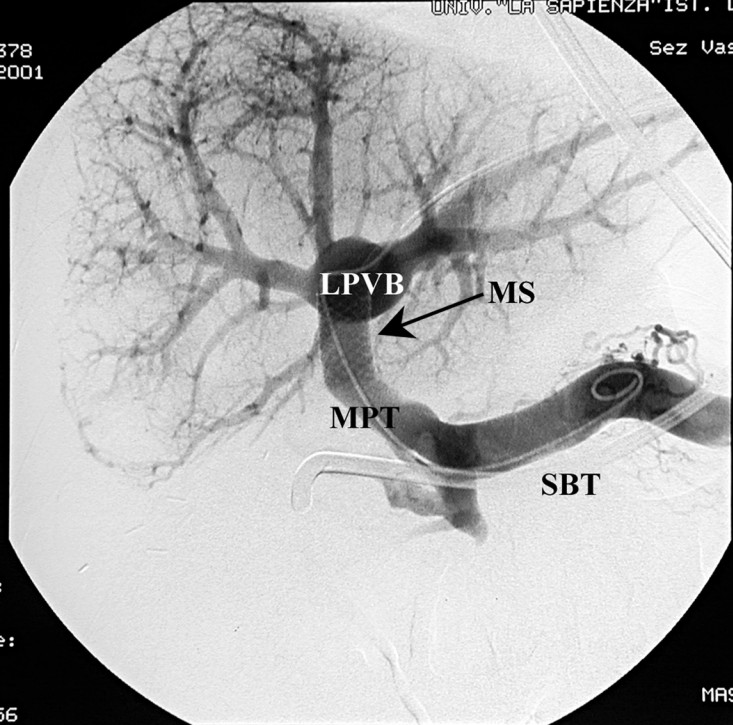

ROT  
-4

ANG  
25

SBT

LPVB

MS

MPT

T-mask:  
0.52  
T-image:  
2.60  
T-run:  
11:38:56

RUN  
19  
17  
MASK IMAGE  
2 6

Supplement: MOESM2 [file 9635458]
